# Supplementary material for: Regularized Regression: A New Tool for Investigating and Predicting Tree Growth
Source: MDPI journal article supplement (doi:10.3390/f12091283), 2021-09-18
Supplement: s1 [file s1]

Archive with 1 entries (1 files):
- forests-1381492-supplementary.pdf
